# Supplementary material
Source: publisher figshare collection journal article supplement (https://acs.figshare.com/ndownloader/files/9455401)
Supplement: Supplementary file 1 [file 9455401]

## **Supporting Information**

### **Unveiling the Self-Assembling Behavior of 5-Fluorouracil and its N,N'-Dimethyl Derivative : A Spectroscopic and Microscopic Approach**

Pavel Banerjee<sup>1</sup>, Devdeep Mukherjee<sup>2</sup>, Tapas Kumar Maiti<sup>2</sup> and Nilmoni Sarkar\*<sup>1</sup>

<sup>1</sup>Department of Chemistry, Indian Institute of Technology, Kharagpur 721302, West Bengal, India

<sup>2</sup>Department of Biotechnology, Indian Institute of Technology, Kharagpur 721302, West Bengal, India

**\*Corresponding Author: Nilmoni Sarkar**

**E-mail: [nilmoni@chem.iitkgp.ernet.in](mailto:nilmoni@chem.iitkgp.ernet.in)**

**Fax: 91-3222-255303**

### **Table of Contents**

|                            |           |
|----------------------------|-----------|
| <b>1. Instrumentations</b> | <b>S3</b> |
| <b>2. Tables</b>           | <b>S3</b> |
| <b>3. Figures</b>          | <b>S4</b> |
| <b>4. Movie 1</b>          |           |

## 1. Instrumentation.

**1.1. Field Emission Scanning Electron Microscopy (FESEM) Measurements.** FESEM measurements were executed with a Supra 40 (Carl Zeiss Pvt. Ltd) instrument after drop casting the sample on a glass slide and complete evaporation of the solvent.

**1.2. Transmission Electron Microscopy (TEM) Measurements.** Transmission electron microscopy (TEM) analysis was carried out by using JEOL model JEM 2010 transmission electron microscope at an operating voltage 200 kV. TEM samples were prepared by blotting a carbon coated (50 nm carbon film) Cu grid (300 mesh, electron microscopy science) with a drop of solution and the samples are allowed to be dried for overnight.

**1.3. Fourier Transform Infrared Spectroscopy (FTIR):** FTIR spectra of all samples were recorded in the range of 650–4000  $\text{cm}^{-1}$  with a Nexus 870 FT-IR spectrometer using a ZnSe cell (MB/HATR Combo Kit Nexus). Each sample was recorded with 32 scans at a spectral resolution of 1.928  $\text{cm}^{-1}$ . All the measurements were carried out at room temperature ( $\sim 25^{\circ}\text{C}$ ). For each spectral deconvolution, using OMNIC software (version-6.0) of the Thermo Nicolet Corporation, we used the same bandwidth and enhancement.

## 2. Supporting Table.

**Table S1 : Diffusion Parameters Obtained by Fitting the Fluorescence Correlation Curves of DCM in 5-FU Fibrils in Different pH of PBS.**

| compound     | pH  | $\tau$ ( $\mu\text{s}$ ) | $D_t$ ( $\mu\text{m}^2 \text{s}^{-1}$ ) | $R^2$ |
|--------------|-----|--------------------------|-----------------------------------------|-------|
| 5-FU ( PBS ) | 5.6 | $172 \pm 13$             | $193 \pm 14$                            | 0.92  |
|              | 8.0 | $155 \pm 10$             | $214 \pm 13$                            | 0.94  |

## 2. Supporting Figures.

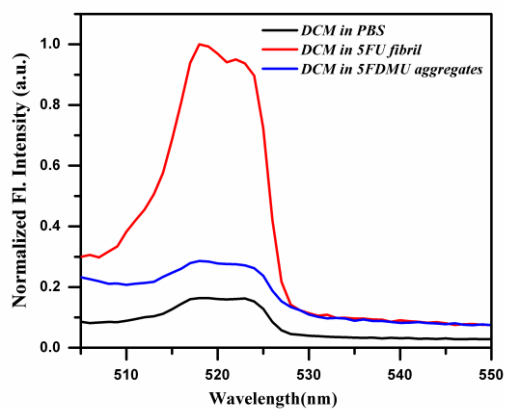

**Figure S1 . Steady state emission spectra of DCM in 5-FU fibrils (red) and 5-FDMU aggregates (blue) with respect to blank (i.e. DCM in PBS only).**

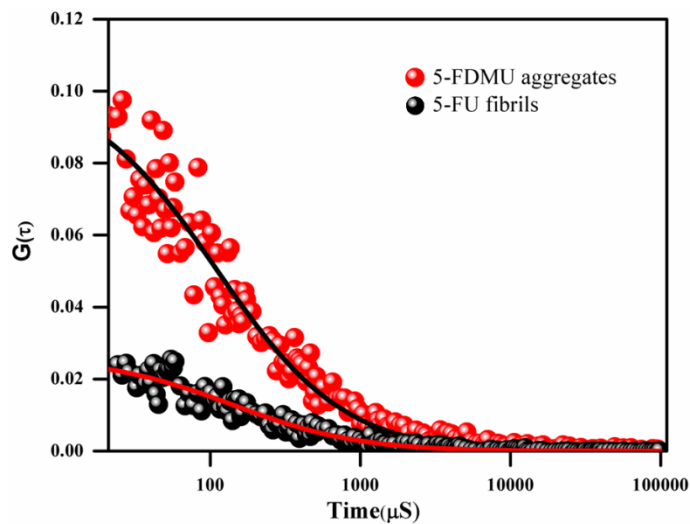

**Figure S2 : FCS traces for 5-FU fibrils and 5-FDMU aggregates. The solid lines indicate fitted to the data point.**

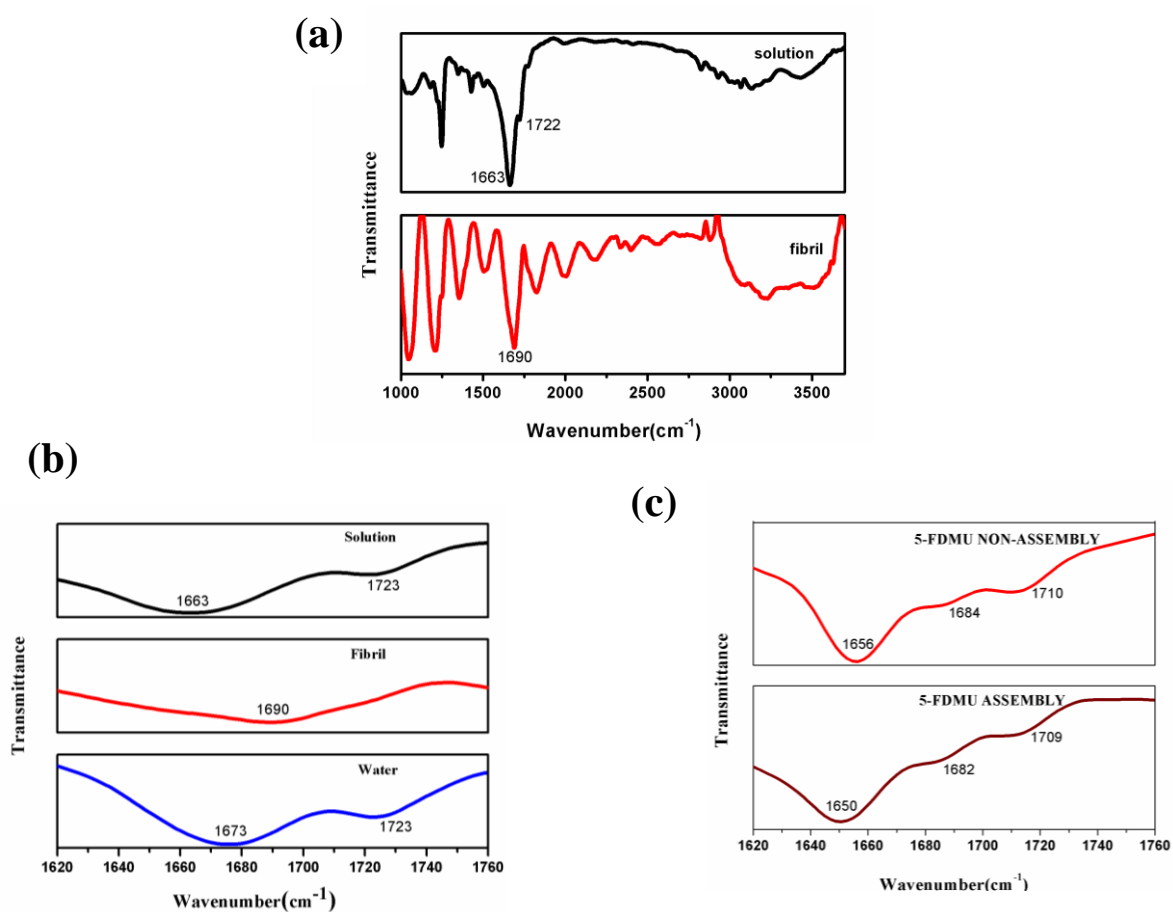

**Figure S3 . FTIR spectra of (a) 5-FU initial solution and fibrillar solution in PBS (b) Monitoring carbonyl peaks of 5-FU in initial solution in PBS, fibrillar solution in PBS and water solution (c) 5-FDMU carbonyl peaks in non-assembly and assembly conditions in PBS.**

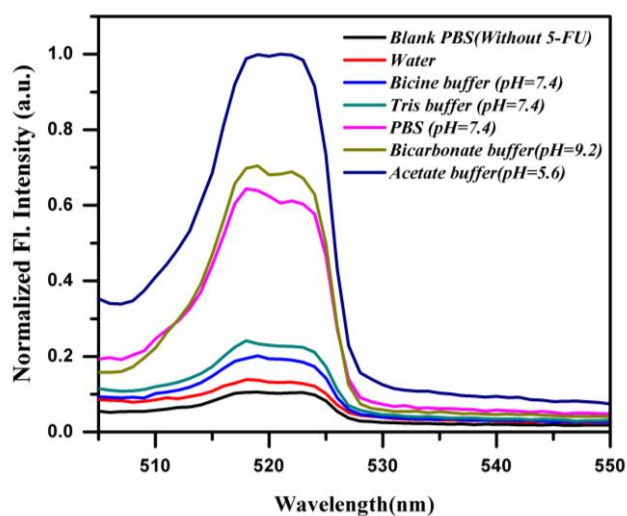

**Figure S4 : Steady state emission spectra of DCM in 5-FU fibrils/aggregates in different buffers.**

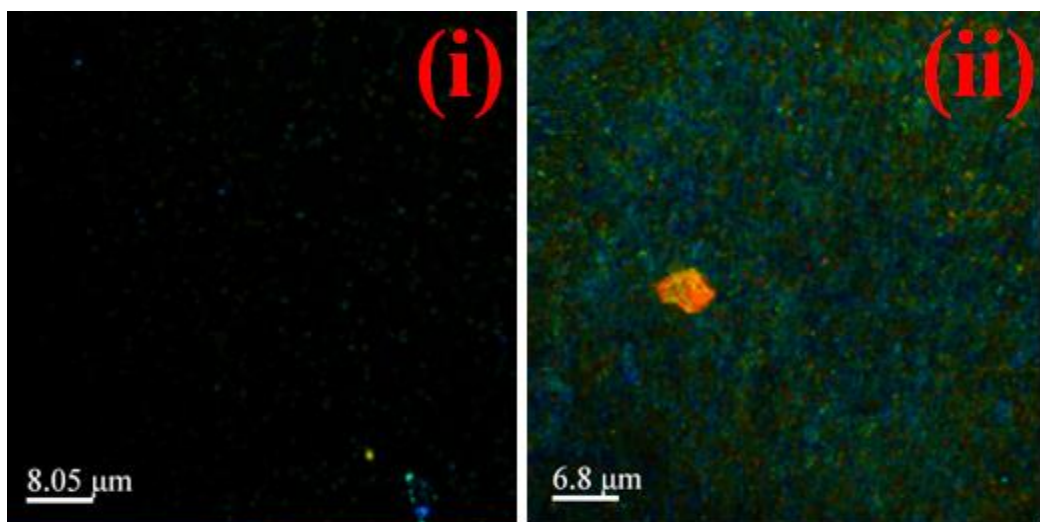

**Figure S5: FLIM images DCM in 100 mM (i) PBS (scale bar is 8.05 μm) (ii) Tris buffer (scale bar is 6.8 μm).**

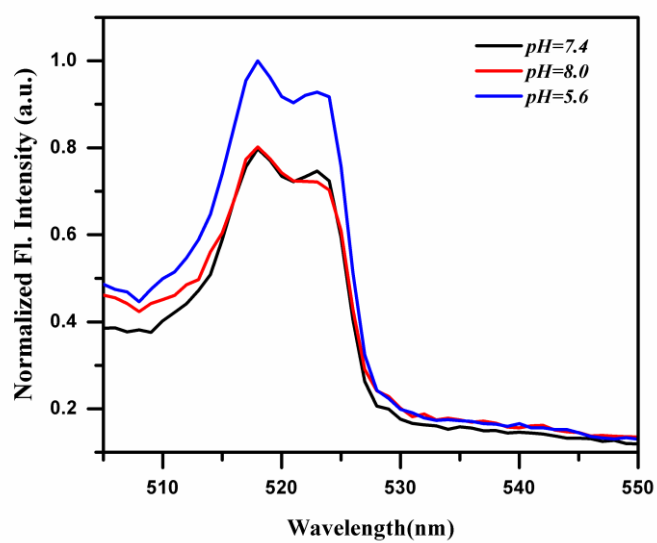

**Figure S6. Normalized Steady state emission spectra of DCM in 5-FU fibrils at three different pH of PBS.**
